# Supplementary material for: Psychosocial and Behavioral Effects of the COVID-19 Pandemic on Children and Adolescents with Autism and Their Families: Overview of the Literature and Initial Data from a Multinational Online Survey
Source: Healthcare (Basel). 2022 Apr 12;10(4):714. doi: 10.3390/healthcare10040714 (PMC9028372; doi:10.3390/healthcare10040714)
Supplement: Supplementary file 1 [file healthcare-10-00714-s001.zip › healthcare-1650632-supplementary.pdf]

## File S1: Online Questionnaire (English)

This document contains supplemental material of the manuscript:

*Kreysa, H., Schneider, D., Kowallik, A.E., Dastgheib, S.S., Doğdu, C., Kühn, G., Rutloff, J., & Schweinberger S.R. (2022). **Psychosocial and Behavioral Effects of the COVID-19 Pandemic on Children and Adolescents with Autism and their Families: Overview of the Literature and Initial Data from a Multinational Online Survey.***

**Thank you very much for participating in our survey. The information you provide will help to provide insights into how the current pandemic has affected the daily life and well-being of families with children with autism in different countries.**

Please note that you must first read through some ethical guidelines before the actual questionnaire begins.

Also note that there is no "Back" button. Therefore, please read each page carefully before proceeding to the next page and do not use the "Back" function in your Internet browser. Thank you very much.

#### Information for Participants

Study: "Effects of the coronavirus pandemic on families and individuals with autism spectrum disorders"

By clicking "Next" you confirm that you have read the detailed information about the study that can be downloaded here.

**VERY IMPORTANT:** For most browser-settings the following applies when clicking on the download link: right click>open in the new tab. Otherwise you will not be able to continue with the questionnaire.

GR03

## Declaration of consent

I was informed in writing about the nature, significance, scope and risks of the scientific study and had the opportunity to clarify my questions about it with the study managers. I was presented with the "Information for Participants" of the study and provided with a download link for this information.

I agree to participate in the study. My participation is voluntary.

I have the right to end my participation at any time without giving reasons and without any negative consequences for the future.

I accept that the personal data collected in the course of this scientific study:

- will at no time be linked to my real name, place of residence or e-mail address,
- be used exclusively for scientific research,
- will initially only be accessible to the scientists involved in this study (Prof. Dr. Stefan Schweinberger, Dr. Dana Schneider, Dr. Helene Kreysa, Samaneh Dastgheib, Andrea Kowallik and Cem Dogdu) and other members of the research group "Social Potential in Autism" at the Friedrich Schiller University of Jena. For possible continuation or replication work, the data can be made available to other researchers in completely anonymous form,
- will be stored, processed and analysed on electronic data carriers and the results obtained will be published in anonymous form.

By clicking "Next", you confirm your consent.

GR20

Please create an anonymous code.

The code consists of the first two letters of your mother's first name, the day you were born, and the last two letters of your own first name.

Example:

Mother= Monica

Your birthday= October 21st

Your first name = John

Code: M021HN

Please write your personal code in the blank text field.

GR19

By beginning the questionnaire, you confirm that you are the care-giver for a school-age child with a clinical diagnosis on the Autism Spectrum, living in the same household.

**Important;** In the following questionnaire, we will refer to this child with **Autism** as **Child A**. We will also ask you to fill out some questions about one other child (**Child B**) who ideally lives in the same household. If you do not have another child in your household please report about another child with whom you are in close contact. We will refer to this child as **Child B**. Child B should **not** have a clinical diagnosis on the Autism Spectrum.

Please note that not all questions in this survey may cover all aspects that were important to you. Therefore, you will find a box for open comments at the end.

In this section, we ask you to provide us with some current information about yourself, your children, where you live, and how the pandemic has affected you.

How many people (including yourself) currently live in your household most of the time?

SIOI 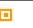

- e 1
- e 2
- e 3
- e 4
- e 5
- e 6
- e 7
- e a
- e g
- e m
- e more than 10

**For each household member (beginning with yourself) please provide some basic information.**

5D19

**I am giving detailed information about...**

GR26

**e** Myself

• Child A- with Autism

**e** Child 8- without Autism

**e** Other sibling

**e** Other parent

**e** Other household member

5D20

Age in full years

SIOS

Gender

SA01

**The person is...**

**e** female

**e** male

**e** other

**e** prefer not to say

**What is the profession of this person?**

SA04

☐ Pupil/in school

☐ Training/apprenticeship

☐ University student

☐ Employee- Full time

☐ Employee- Part time

☐ Civil servant

☐ Self-employed

Unemployed/seeking employment

Other

B137

**Is a clinical diagnosis on the Autism Spectrum known for this person?**

- ☐ Yes
- ☐ Suspected
- ☐ No

**I am giving detailed information about...**

GR27

- ☐ Myself
- ☐ Child A- with Autism
  - ☐ Child B- without Autism
- ☐ Other sibling
- ☐ Other parent
- ☐ Other household member

5D49

Age in full years

SA83

**Gender**

SA02

**The person is...**

- ☐ female
- ☐ male
- ☐ other
- ☐ prefer not to say

**What is the profession of this person?**

SA38

- ☐ Pupil/in school
- ☐ Training/apprenticeship
- ☐ University student
- ☐ Employee- Full time
- ☐ Employee- Part time
- ☐ Civil servant
- ☐ Self-employed
- ☐ Unemployed/seeking employment

Other

B138

**Is a clinical diagnosis on the Autism Spectrum known for this person?**

- ☐ Yes
- ☐ Suspected
- ☐ No

**I am giving detailed information about...**

**GR28**

- ☐ Myself
- ☐ Child A- with Autism
- ☐ Child B- without Autism
- ☐ Other sibling
- ☐ Other parent
- ☐ Other household member

**5D53**

Age in full years

**SA87**

**Gender**

**SA03**

**The person is...**

- ☐ female
- ☐ male
- ☐ other
- ☐ prefer not to say

**What is the profession of this person?**

**SA39**

- ☐ Pupil/in school
- ☐ Training/apprenticeship
- ☐ University student
- ☐ Employee- Full time
- ☐ Employee- Part time
- ☐ Civil servant
- ☐ Self-employed
- ☐ Unemployed/seeking employment

Other

**B28**

**Is a clinical diagnosis on the Autism Spectrum known for this person?**

- ☐ Yes
- ☐ Suspected
- ☐ No

**I am giving detailed information about...**

GR29

- ☐ Myself
- ☐ Child A- with Autism
- ☐ Child B- without Autism
- ☐ Other sibling
- ☐ Other parent
- ☐ Other household member

5D54

Age in full years

SA91

**Gender**

SA16

**The person is...**

- ☐ female
- ☐ male
- ☐ other
- ☐ prefer not to say

**What is the profession of this person?**

SA40

- ☐ Pupil/in school
- ☐ Training/apprenticeship
- ☐ University student
- ☐ Employee- Full time
- ☐ Employee- Part time
- ☐ Civil servant
- ☐ Self-employed
- ☐ Unemployed/seeking employment

Other

B29

**Is a clinical diagnosis on the Autism Spectrum known for this person?**

- ☐ Yes
- ☐ Suspected
- ☐ No

**I am giving detailed information about...**

GR30

- ☐ Myself
- ☐ Child A- with Autism
  - ☐ Child B- without Autism
- ☐ Other sibling
- ☐ Other parent
- ☐ Other household member

SDSS

Age in full years

SA95

**Gender**

SA17

**The person is...**

- ☐ female
- ☐ male
- ☐ other
- ☐ prefer not to say

**What is the profession of this person?**

SA41

- ☐ Pupil/in school
- ☐ Training/apprenticeship
- ☐ University student
- ☐ Employee- Full time
- ☐ Employee- Part time
- ☐ Civil servant
- ☐ Self-employed
- ☐ Unemployed/seeking employment

Other

B30

**Is a clinical diagnosis on the Autism Spectrum known for this person?**

- ☐ Yes
- ☐ Suspected
- ☐ No

**I am giving detailed information about...**

GR46

- ☐ Myself
- ☐ Child A- with Autism
  - ☐ Child B- without Autism
- ☐ Other sibling
- ☐ Other parent
- ☐ Other household member

5D56

Age in full years

SA99

**Gender**

SA18

**The person is...**

- ☐ female
- ☐ male
- ☐ other
- ☐ prefer not to say

**What is the profession of this person?**

SA42

- ☐ Pupil/in school
- ☐ Training/apprenticeship
- ☐ University student
- ☐ Employee- Full time
- ☐ Employee- Part time
- ☐ Civil servant
- ☐ Self-employed
- ☐ Unemployed/seeking employment

Other

B31

**Is a clinical diagnosis on the Autism Spectrum known for this person?**

- ☐ Yes
- ☐ Suspected
- ☐ No

---

Page 08

Diagnosis

**For Child A, please indicate the severity of impairment due to their Autism Spectrum condition.**

B129

- ☐ requires little or no support
- ☐ requires support
- ☐ requires substantial support
- ☐ requires very substantial support

**Is Child A impaired in any other way?**

B130

- ☐ yes (we would be very grateful if you could provide further information)
- ☐ no
- ☐ prefer not to say

Please indicate how much the following questions apply to Child A. Please tick one option per question 'a?..?I' 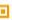

|                                                                                                          | strongly agree        | agree                 | disagree              | strongly disagree     |
|----------------------------------------------------------------------------------------------------------|-----------------------|-----------------------|-----------------------|-----------------------|
| 1. S/he often notices small sounds when others do not.                                                   | <input type="radio"/> | <input type="radio"/> | <input type="radio"/> | <input type="radio"/> |
| 2. S/he usually concentrates more on the whole picture, rather than the small details.                   | <input type="radio"/> | <input type="radio"/> | <input type="radio"/> | <input type="radio"/> |
| 3. In a social group, s/he can easily keep track of several different people's conversations.            | <input type="radio"/> | <input type="radio"/> | <input type="radio"/> | <input type="radio"/> |
| 4. S/he finds it easy to go back and forth between different activities.                                 | <input type="radio"/> | <input type="radio"/> | <input type="radio"/> | <input type="radio"/> |
| 5. S/he doesn't know how to keep a conversation going with his/her peers.                                | <input type="radio"/> | <input type="radio"/> | <input type="radio"/> | <input type="radio"/> |
| 6. S/he is good at social chit-chat.                                                                     | <input type="radio"/> | <input type="radio"/> | <input type="radio"/> | <input type="radio"/> |
| 7. Whens/he is read a story, s/he finds it difficult to work out the character's intentions or feelings. | <input type="radio"/> | <input type="radio"/> | <input type="radio"/> | <input type="radio"/> |
| 8. When s/he was in preschool, s/he used to enjoy playing games involving pretending with other children | <input type="radio"/> | <input type="radio"/> | <input type="radio"/> | <input type="radio"/> |
| 9. S/he finds it easy to work out what someone is thinking or feeling just by looking at their face      | <input type="radio"/> | <input type="radio"/> | <input type="radio"/> | <input type="radio"/> |
| 10. S/he finds it hard to make new friends                                                               | <input type="radio"/> | <input type="radio"/> | <input type="radio"/> | <input type="radio"/> |

Please indicate how much the following questions apply to Child B. Please tick one option per question 'a?..?I' 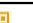

|                                                                                                          | strongly agree        | agree                 | disagree              | strongly disagree     |
|----------------------------------------------------------------------------------------------------------|-----------------------|-----------------------|-----------------------|-----------------------|
| 1. S/he often notices small sounds when others do not.                                                   | <input type="radio"/> | <input type="radio"/> | <input type="radio"/> | <input type="radio"/> |
| 2. S/he usually concentrates more on the whole picture, rather than the small details.                   | <input type="radio"/> | <input type="radio"/> | <input type="radio"/> | <input type="radio"/> |
| 3. In a social group, s/he can easily keep track of several different people's conversations             | <input type="radio"/> | <input type="radio"/> | <input type="radio"/> | <input type="radio"/> |
| 4. S/he finds it easy to go back and forth between different activities.                                 | <input type="radio"/> | <input type="radio"/> | <input type="radio"/> | <input type="radio"/> |
| 5. S/he doesn't know how to keep a conversation going with his/her peers.                                | <input type="radio"/> | <input type="radio"/> | <input type="radio"/> | <input type="radio"/> |
| 6. S/he is good at social chit-chat.                                                                     | <input type="radio"/> | <input type="radio"/> | <input type="radio"/> | <input type="radio"/> |
| 7. Whens/he is read a story, s/he finds it difficult to work out the character's intentions or feelings. | <input type="radio"/> | <input type="radio"/> | <input type="radio"/> | <input type="radio"/> |
| 8. When s/he was in preschool, s/he used to enjoy playing games involving pretending with other children | <input type="radio"/> | <input type="radio"/> | <input type="radio"/> | <input type="radio"/> |
| 9. S/he finds it easy to work out what someone is thinking or feeling just by looking at their face      | <input type="radio"/> | <input type="radio"/> | <input type="radio"/> | <input type="radio"/> |
| 10. S/he finds it hard to make new friends                                                               | <input type="radio"/> | <input type="radio"/> | <input type="radio"/> | <input type="radio"/> |

What kind of accommodation do you live in?

D501

☐ flat

☐ house

☐ other

Do any household members live somewhere else some of the time?

D502

☐ No

☐ Yes, please specify

Does your accommodation have direct access to the outside?

D503

☐ no

☐ balcony

☐ garden

☐ yard

other, please specify

How many bedrooms are there in your accommodation?

D504

☐ 0

☐ 1

☐ 2

☐ 3

☐ 4

☐ 5

☐ 6

☐ 7

☐ 8

☐ 9

☐ 10 or more

Is there a private room for each child in the household?

D518

☐ yes

☐ no

☐ unclear

**Please indicate the population size of your community.**

DC01 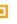

- ☐ less than one hundred
- ☐ between one hundred and one thousand
- ☐ between one thousand and ten thousand
- ☐ between ten thousand and one hundred thousand
- ☐ between one hundred thousand and one million
- ☐ more than one million

**Which is the country, you're currently living in?**

ED05 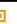

Country:

**Were you born where you are currently living?**

ED17 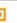

- ☐ yes, in this country and in this community/ town
- ☐ yes, in this country, but in a different community/ town
- ☐ in a different country
- ☐ prefer not to say

We are planning to circulate this survey in several different countries, so please let us know about the situation where you live.

Where you live, did the current pandemic lead to the following administrative restrictions at any time?

CP15

School closures

Complete lockdown

Where you live, are the following measures currently still in place?

CP02

|                                                                                                                             | Yes                   | No                    | Partially             | I don't know          |
|-----------------------------------------------------------------------------------------------------------------------------|-----------------------|-----------------------|-----------------------|-----------------------|
| School closures                                                                                                             | <input type="radio"/> | <input type="radio"/> | <input type="radio"/> | <input type="radio"/> |
| Complete lockdown                                                                                                           | <input type="radio"/> | <input type="radio"/> | <input type="radio"/> | <input type="radio"/> |
| Limits on groups of people                                                                                                  | <input type="radio"/> | <input type="radio"/> | <input type="radio"/> | <input type="radio"/> |
| Limits on time and activities outside the house                                                                             | <input type="radio"/> | <input type="radio"/> | <input type="radio"/> | <input type="radio"/> |
| Wearing protective clothing / face masks in public                                                                          | <input type="radio"/> | <input type="radio"/> | <input type="radio"/> | <input type="radio"/> |
| Travel restrictions                                                                                                         | <input type="radio"/> | <input type="radio"/> | <input type="radio"/> | <input type="radio"/> |
| Limits on sports and cultural activities                                                                                    | <input type="radio"/> | <input type="radio"/> | <input type="radio"/> | <input type="radio"/> |
| Restrictions for religious events                                                                                           | <input type="radio"/> | <input type="radio"/> | <input type="radio"/> | <input type="radio"/> |
| Restricted (non-corona) health-care and therapy options                                                                     | <input type="radio"/> | <input type="radio"/> | <input type="radio"/> | <input type="radio"/> |
| Mandatory quarantine                                                                                                        | <input type="radio"/> | <input type="radio"/> | <input type="radio"/> | <input type="radio"/> |
| Other (e.g., requirement/ encouragement to carry tracking devices, documentation of purpose of visit or health status, ...) | <input type="radio"/> | <input type="radio"/> | <input type="radio"/> | <input type="radio"/> |

What is your personal prediction about the future regarding the current crisis? When do you think the pandemic will be over?

- ☐ 1 month
- ☐ 3 months
- ☐ 6 months
- ☐ 1 year
- ☐ several years
- ☐ never

**In the following, we are interested in how children and adolescents on the Autism spectrum spend their day.**

AC01

For each of the following activities, please estimate how much time Child A (i.e., the autistic person you are reporting about) spent / spends on it in hours on a typical 24-hour day. Note, you can give proportions of the hour (e.g., 30 min = 0.5).

**1. Use of digital devices (smartphone, tablet, laptop) for social communication (e.g. chatting with friends/family).**

Before corona restrictions

[Please choose] v

At the peak of the crisis

[Please choose] v

ACSS

Currently

[Please choose] v

AC59

**2. Use of digital devices (smartphone, tablet, laptop) for entertainment (e.g., games, films, surfing the Web).**

Before corona restrictions

[Please choose] v

At the peak of the crisis

[Please choose] v

AC60

Currently

[Please choose] v

AC68

**3. Use of digital devices (smartphone, tablet, laptop) for education (e.g., homeschooling).**

Before corona restrictions

[Please choose] v

AA79

At the peak of the crisis

[Please choose] v

AA78

Currently

AA77 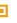 v**4. Use of digital devices (smartphone, tablet, laptop) for - therapy, consultation, and coaching.**AA72 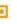

Before corona restrictions

 v

At the peak of the crisis

AA71 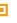 v

Currently

AA89 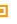 v**5. Special interests and hobbies.**AA66 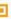

Before corona restrictions

 v

At the peak of the crisis

AA65 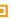 v

Currently

AA64  v**6. Inside the house.**AD01 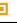

Before corona restrictions

 v

At the peak of the crisis

AD02  v

Currently

AD03  vAD07 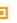

**7. In the garden or on the balcony.**

Before corona restrictions

 v

At the peak of the crisis

ADOS 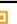 v

Currently

AD09 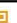 v**8. Outside (but not in your own garden or on your own balcony).**

Before corona restrictions

 vAD13 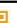

At the peak of the crisis

AD14 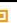 v

Currently

AD15 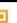 v**9. Sleeping or in bed.**

Before corona restrictions

 vAD19 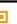

At the peak of the crisis

AD20 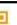 v

Currently

AD21 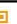 v

In the following, we are interested in how other children and adolescents spend their day.

For each of the following activities, please now estimate how much time Child B (i.e., the other child/adolescent you are reporting about) spent / spends on it in hours on a typical 24-hour day. Note again, you can give proportions of the hour (e.g., 30 min = 0.5).

### 1. Use of digital devices (smartphone, tablet, laptop) for social communication (e.g. chatting with friends/family).

Before corona restrictions

[Please choose] v

At the peak of the crisis

[Please choose] v

AC90

Currently

[Please choose] v

AC91

### 2. Use of digital devices (smartphone, tablet, laptop) for entertainment (e.g., games, films, surfing the Web, etc.).

Before corona restrictions

[Please choose] v

At the peak of the crisis

[Please choose] v

AC96

Currently

[Please choose] v

AC97

### 3. Use of digital devices (smartphone, tablet, laptop) for education (e.g., homeschooling).

Before corona restrictions

[Please choose] v

AA81

At the peak of the crisis

[Please choose] v

AA82

Currently

AA83 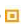 v**4. Use of digital devices (smartphone, tablet, laptop) for - therapy, consultation, and coaching.**AA87 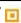

Before corona restrictions

 v

At the peak of the crisis

AA88 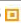 v

Currently

AA70 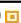 v**5. Special interests and hobbies.**AA93 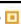

Before corona restrictions

 v

At the peak of the crisis

AA94 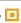 v

Currently

AA95 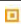 v**6. Inside the house.**AD25 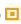

Before corona restrictions

 v

At the peak of the crisis

AD26 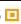 v

Currently

AD27 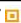 vAD31 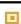

**7. In the garden or on the balcony.**

Before corona restrictions

 v

At the peak of the crisis

AD32 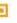 v

Currently

AD33  v**8. Outside (but not in your own garden or on your own balcony).**

Before corona restrictions

 vAD37 

At the peak of the crisis

AD38 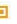 v

Currently

AD39 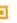 v**9. Sleeping or in bed.**

Before corona restrictions

 vAD43 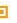

At the peak of the crisis

AD44 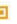 v

Currently

AD45  v

**The next questions concern changes in the health and well-being of children and adolescents.**

HBOI

Please rate the following aspects for Child A at the present moment in time, compared to the time before the current pandemic.

|                        | much<br>decreased     | slightly<br>decreased | similar               | slightly<br>increased | much<br>increased     |
|------------------------|-----------------------|-----------------------|-----------------------|-----------------------|-----------------------|
| General well-being     | <input type="radio"/> |
| Adaptation abilities   | <input type="radio"/> |
| Overall anxiety levels | <input type="radio"/> |
| Emotional reactions    | <input type="radio"/> |
| Social behaviour       | <input type="radio"/> |

Please rate the following aspects for Child B at the present moment in time, compared to the time before the current pandemic.

|                        | much<br>decreased     | slightly<br>decreased | similar               | slightly<br>increased | much<br>increased     |
|------------------------|-----------------------|-----------------------|-----------------------|-----------------------|-----------------------|
| General well-being     | <input type="radio"/> |
| Adaptation abilities   | <input type="radio"/> |
| Overall anxiety levels | <input type="radio"/> |
| Emotional reactions    | <input type="radio"/> |
| Social behaviour       | <input type="radio"/> |

Please indicate how Child A responds to the following pandemic hygiene routines.

HB05 

not applicable   negative   neutral   positive

Maintaining physical distance to other people (1.5 m)

☒   ☒   ☒   ☒

Regular hand-washing

☒   ☒   ☒   ☒

Use of disinfectant

☒   ☒   ☒   ☒

Wearing a face mask

☒   ☒   ☒   ☒

Please indicate how Child B responds to the following pandemic hygiene routines.

HB07 

not applicable   negative   neutral   positive

Maintaining physical distance to other people (1.5 m)

☒   ☒   ☒   ☒

Regular hand-washing

☒   ☒   ☒   ☒

Use of disinfectant

☒   ☒   ☒   ☒

Wearing a face mask

☒   ☒   ☒   ☒

**PedsQL™**

PP80

**Pediatric Quality of Life Inventory™**

Version 4.0

Parent Report for Children (ages 8-12)

PedsQL™ Copyright © 1998 JW Varni, Ph.D. All rights reserved.

PP53

All originals items of the PedSql are copyrighted. Therefore, we have only presented the parts that reflect our own instructions specific to this study.

**You are now filling this in for Child A.**

PQ49

Items related to the problems with physical functioning.

PQ02 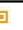

1.

- ☐ 0-  
☐ 1-  
☐ 2-  
☐ 3-  
☐ 4-

2.

- ☐ 0-  
☐ 1-  
☐ 2-  
☐ 3-  
☐ 4-

PQ66 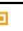

## 3. Participating in sports activity or exercise

PQ67 

- e** 0- Never
- e** 1- Almost Never
- e** 2- Sometimes
- e** 3- Often
- e** 4- Almost Always

## 4. Lifting something heavy

PI25 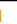

- e** 0- Never
- e** 1- Almost Never
- e** 2- Sometimes
- e** 3- Often
- e** 4- Almost Always

## 5. Taking a bath or shower by him or herself

PI27 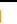

- e** 0- Never
- e** 1- Almost Never
- e** 2- Sometimes
- e** 3- Often
- e** 4- Almost Always

## 6. Doing chores around the house

PI29 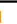

- e** 0- Never
- e** 1- Almost Never
- e** 2- Sometimes
- e** 3- Often
- e** 4- Almost Always

## 7. Having hurts and aches

PI31 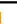

- e** 0- Never
- e** 1- Almost Never
- e** 2- Sometimes
- e** 3- Often
- e** 4- Almost Always

PI33 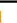

## 8. Low energy level

- e** 0- Never
- e** 1- Almost Never
- e** 2- Sometimes
- e** 3- Often
- e** 4- Almost Always

PP88

**PedsQLTM****Pediatric Quality of Life InventoryTM****Version 4.0****Parent Report for Children (ages 8-12)**

PedsQLTM Copyright© 1998 JW Varni, Ph.D. All rights reserved.

In Items related to the problems with emotional functioning: **your child had with...**

PI65 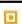**EMOTIONAL FUNCTIONING (problems with...)**

1. Feeling afraid or scared

- e** 0- Never
- e** 1- Almost Never
- e** 2- Sometimes
- e** 3- Often
- e** 4- Almost Always

2. Feeling sad or blue

- e** 0- Never
- e** 1- Almost Never
- e** 2- Sometimes
- e** 3- Often
- e** 4- Almost Always

PI66 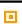

3. Feeling angry

- e** 0- Never
- e** 1- Almost Never
- e** 2- Sometimes
- e** 3- Often
- e** 4- Almost Always

PI67 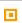PI68 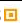

## 4. Trouble sleeping

- e** 0- Never
- e** 1- Almost Never
- e** 2- Sometimes
- e** 3- Often
- e** 4- Almost Always

## 5. Worrying about what will happen to him or her

PT01 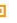

- e** 0- Never
- e** 1- Almost Never
- e** 2- Sometimes
- e** 3- Often
- e** 4- Almost Always

**PedsQLTM**

PP89

**Pediatric Quality of Life InventoryTM****Version 4.0****Parent Report for Children (ages 8-12)**

PedsQLTM Copyright© 1998 JW Varni, Ph.D. All rights reserved.

In Items related to the problems with social functioning: **has your child had with...**

PT25

**SOCIAL FUNCTIONING (problems with...)**

1. Getting along with other children

- ☐ 0- Never
- ☐ 1- Almost Never
- ☐ 2- Sometimes
- ☐ 3- Often
- ☐ 4- Almost Always

2. Other kids not wanting to be his or her friend

PT26

- ☐ 0- Never
- ☐ 1- Almost Never
- ☐ 2- Sometimes
- ☐ 3- Often
- ☐ 4- Almost Always

3. Getting teased by other children

PT27

- ☐ 0- Never
- ☐ 1- Almost Never
- ☐ 2- Sometimes
- ☐ 3- Often
- ☐ 4- Almost Always

PT28

4. Not able to do things that other children his or her age can do

- e** 0- Never
- e** 1- Almost Never
- e** 2- Sometimes
- e** 3- Often
- e** 4- Almost Always

5. Keeping up when playing with other children

PT29 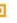

- e** 0- Never
- e** 1- Almost Never
- e** 2- Sometimes
- e** 3- Often
- e** 4- Almost Always

Items related to the problems with school functioning:

**In the past ONE month, how much of a problem has your child had with...**

PP09 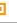

**SCHOOL FUNCTIONING (problems with...)**

1. Pay attention in class

- e** 0- Never
- e** 1- Almost Never
- e** 2- Sometimes
- e** 3- Often
- e** 4- Almost Always

2. Forgetting things

PP10 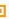

- e** 0- Never
- e** 1- Almost Never
- e** 2- Sometimes
- e** 3- Often
- e** 4- Almost Always

3. Keeping up with schoolwork

PP11 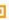

- e** 0- Never
- e** 1- Almost Never
- e** 2- Sometimes
- e** 3- Often
- e** 4- Almost Always

PP12 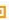

4. Missing school because of not feeling well

- e** 0- Never
- e** 1- Almost Never
- e** 2- Sometimes
- e** 3- Often
- e** 4- Almost Always

5. Missing school to go to the doctor or hospital

PP13 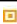

- e** 0- Never
- e** 1- Almost Never
- e** 2- Sometimes
- e** 3- Often
- e** 4- Almost Always

PP49

For any information on the use of the **PedsQL™** , please contact Mapi Research Trust, Lyon, France.

Internet: <https://eprovide.mapi-trust.org>

PP84

**PedsQLTM****Pediatric Quality of Life InventoryTM****Version 4.0****Parent Report for Children (ages 8-12)**PedsQL<sup>TM</sup> Copyright© 1998 JW Varni, Ph.D. All rights reserved.**DIRECTIONS**

PPS4

On the following screens are things that might be a problem for your child.

Please tell us how much of a problem each one has been for your child during the past ONE month by selecting:

0 if it is never a problem

1 if it is almost never a problem

2 if it is sometimes a problem

3 if it is often a problem

4 if it is almost always a problem

There are no right or wrong answers. If you do not understand a question, please ask for help.

**You are now filling this in for Child B.**

PQSO

Items related to the problems with physical functioning.

**In the past ONE month, how much of a problem has your child had with...**

PQ73

**PHYSICAL FUNCTIONING (problems with...)**

1. Walking more than one block

☐ 0- Never

☐ 1-Almost Never

☐ 2- Sometimes

☐ 3- Often

☐ 4- Almost Always

2. Running

☐ 0- Never

☐ 1-Almost Never

☐ 2- Sometimes

☐ 3- Often

☐ 4- Almost Always

PQ74

## 3. Participating in sports activity or exercise

PQ7S

- e** 0- Never
- e** 1- Almost Never
- e** 2- Sometimes
- e** 3- Often
- e** 4- Almost Always

## 4. Lifting something heavy

PI26

- e** 0- Never
- e** 1- Almost Never
- e** 2- Sometimes
- e** 3- Often
- e** 4- Almost Always

## 5. Taking a bath or shower by him or herself

PI28

- e** 0- Never
- e** 1- Almost Never
- e** 2- Sometimes
- e** 3- Often
- e** 4- Almost Always

## 6. Doing chores around the house

PI30

- e** 0- Never
- e** 1- Almost Never
- e** 2- Sometimes
- e** 3- Often
- e** 4- Almost Always

## 7. Having hurts and aches

PI32

- e** 0- Never
- e** 1- Almost Never
- e** 2- Sometimes
- e** 3- Often
- e** 4- Almost Always

PI34

## 8. Low energy level

- ☐ 0- Never
- ☐ 1- Almost Never
- ☐ 2- Sometimes
- ☐ 3- Often
- ☐ 4- Almost Always

PP96

**PedsQL™****Pediatric Quality of Life Inventory™**

Version 4.0

Parent Report for Children (ages 8-12)

PedsQL™ Copyright© 1998 JW Varni, Ph.D. All rights reserved.

Items related to the problems with emotional functioning:

**In the past ONE month, how much of a problem has your child had with...**P170 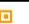**Emotional Functioning (problems with...)**1. **Feeling** afraid or scared

- e** 0- Never
- e** 1- Almost Never
- e** 2- Sometimes
- e** 3- Often
- e** 4- Almost Always

2. Feeling sad or blue

- e** 0- Never
- e** 1- Almost Never
- e** 2- Sometimes
- e** 3- Often
- e** 4- Almost Always

P171 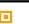

3. Feeling angry

- e** 0- Never
- e** 1- Almost Never
- e** 2- Sometimes
- e** 3- Often
- e** 4- Almost Always

P172 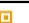P173 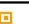

## 4. Trouble sleeping

- e** 0- Never
- e** 1- Almost Never
- e** 2- Sometimes
- e** 3- Often
- e** 4- Almost Always

## 5. Worrying about what will happen to him or her

PT03 

- e** 0- Never
- e** 1- Almost Never
- e** 2- Sometimes
- e** 3- Often
- e** 4- Almost Always

PP97

**PedsQL™****Pediatric Quality of Life Inventory™****Version 4.0****Parent Report for Children (ages 8-12)**

PedsQL™ Copyright© 1998 JW Varni, Ph.D. All rights reserved.

Items related to the problems with social functioning:

**In the past ONE month, how much of a problem has your child had with...**

PT30 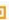**SOCIAL FUNCTIONING (problems with...)**

1. Getting along with other children

- e** 0- Never
- e** 1- Almost Never
- e** 2- Sometimes
- e** 3- Often
- e** 4- Almost Always

2. Other kids not wanting to be his or her friend

- e** 0- Never
- e** 1- Almost Never
- e** 2- Sometimes
- e** 3- Often
- e** 4- Almost Always

PT31 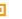

3. Getting teased by other children

- e** 0- Never
- e** 1- Almost Never
- e** 2- Sometimes
- e** 3- Often
- e** 4- Almost Always

PT32 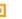PT33 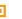

4. Not able to do things that other children his or her age can do

- ☐ 0- Never
- ☐ 1- Almost Never
- ☐ 2- Sometimes
- ☐ 3- Often
- ☐ 4- Almost Always

5. Keeping up when playing with other children

PT34 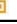

- ☐ 0- Never
- ☐ 1- Almost Never
- ☐ 2- Sometimes
- ☐ 3- Often
- ☐ 4- Almost Always

In Items related to the problems with school functioning: **has your child had with...**

PP14 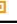

**SCHOOL FUNCTIONING (problems with...)**

1. Pay attention in class

- ☐ 0- Never
- ☐ 1- Almost Never
- ☐ 2- Sometimes
- ☐ 3- Often
- ☐ 4- Almost Always

2. Forgetting things

PP15 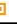

- ☐ 0- Never
- ☐ 1- Almost Never
- ☐ 2- Sometimes
- ☐ 3- Often
- ☐ 4- Almost Always

3. Keeping up with schoolwork

PP16 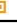

- ☐ 0- Never
- ☐ 1- Almost Never
- ☐ 2- Sometimes
- ☐ 3- Often
- ☐ 4- Almost Always

PP17 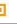

4. Missing school because of not feeling well

- ☐ 0- Never
- ☐ 1- Almost Never
- ☐ 2- Sometimes
- ☐ 3- Often
- ☐ 4- Almost Always

5. Missing school to go to the doctor or hospital

PP18 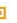

- ☐ 0- Never
- ☐ 1- Almost Never
- ☐ 2- Sometimes
- ☐ 3- Often
- ☐ 4- Almost Always

PPSS

For any information on the use of the **PedsQL™**, please contact Mapi Research Trust, Lyon, France.

Internet: <https://eprovide.mapi-trust.org>

Page 24

13

Now please let us know how the current pandemic affected your entire family or household. 1 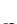

Please rate the following aspects for your family at the present moment in time, compared to the time before the current pandemic. V01 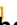

|                         | much decreased        | slightly decreased    | similar               | slightly increased    | much increased        |
|-------------------------|-----------------------|-----------------------|-----------------------|-----------------------|-----------------------|
| Overall stress levels   | <input type="radio"/> |
| Regular daily structure | <input type="radio"/> |
| Conflict                | <input type="radio"/> |
| Time spent together     | <input type="radio"/> |
| Emotional closeness     | <input type="radio"/> |

During the current pandemic did you receive any form of support through the following people or institutions? Please indicate all that apply. ST01

**Support by....**

- ☐ Close family
- ☐ Extended family and friends
- ☐ Neighbours
- ☐ Institutions
- ☐ Health service
- ☐ Government

Which (if any) forms of support did you find particularly useful and why? ST02

Close family, because...

Extended family and friends, because... ST05

Neighbours, because... ST06

Institutions, because ... ST07

Health service, because... ST08

Government, because... ST09

(How) did the current pandemic affect your child's ASD-specific educational and therapy/ rehabilitation activities? ST01

Did you experience any other specific challenges during the current pandemic?

ST04

---

Page 26

00

This is the open answer box that allows you to tell us about other aspects of the pandemic that were important to you.

ST42

---

Last Page

## Thank you for completing this questionnaire!

We would like to thank you very much for helping us.

Your answers were transmitted, you may close the browser window or tab now.

---

Dr. Dana Schneider, Friedrich Schiller University Jena - 2020
